# Supplementary material
Source: HighWire-hosted journal article supplement (http://spcare.bmj.com/highwire/filestream/157381/field_highwire_adjunct_files/0/spcare-2023-004465supp001_data_supplement.pdf)
Supplement: spcare-2023-004465supp001_data_supplement.pdf [file spcare-2023-004465supp001_data_supplement.pdf]

## Appendix S1 Search strategy

|                                                                                                                                                                                                                                                                                                                                                                                                                                                                                                                                                                                                                                                                                                                                                                                                                                                                                                                                                      |
|------------------------------------------------------------------------------------------------------------------------------------------------------------------------------------------------------------------------------------------------------------------------------------------------------------------------------------------------------------------------------------------------------------------------------------------------------------------------------------------------------------------------------------------------------------------------------------------------------------------------------------------------------------------------------------------------------------------------------------------------------------------------------------------------------------------------------------------------------------------------------------------------------------------------------------------------------|
| <p>("palliative care"[MeSH Terms] OR "palliative care"[Title/Abstract] OR "advance care planning"[MeSH Terms] OR "advance care plan*"[Title/Abstract] OR "terminal care"[MeSH Terms] OR "terminal care"[Title/Abstract] OR "terminally ill"[MeSH Terms] OR "terminally ill"[Title/Abstract] OR ("hospices"[MeSH Terms] OR "hospice care"[MeSH Terms]) OR "hospice"[Title/Abstract] OR "hospice care"[MeSH Terms] OR "hospice care"[Title/Abstract] OR "life support care"[MeSH Terms] OR "life support care"[Title/Abstract] OR "death"[MeSH Terms] OR "death"[Title/Abstract] OR "palliat*"[Title/Abstract] OR "advance directives"[Title/Abstract] OR "end of life care"[Title/Abstract] OR "supportive care"[Title/Abstract] OR ("last"[All Fields] AND "months of life"[Title/Abstract]) OR "last year of life"[Title/Abstract] OR "life-limiting"[Title/Abstract] OR "life-threatening"[Title/Abstract] OR "deterioration"[Title/Abstract])</p> |
| AND                                                                                                                                                                                                                                                                                                                                                                                                                                                                                                                                                                                                                                                                                                                                                                                                                                                                                                                                                  |
| <p>("screening tools"[Title/Abstract] OR "tool*"[Title/Abstract] OR "instrument"[Title/Abstract] OR "assessment"[Title/Abstract] OR "guidance"[Title/Abstract] OR "guideline"[Title/Abstract] OR "indicator"[Title/Abstract] OR "risk assessment"[MeSH Terms] OR "risk assessment"[Title/Abstract] OR "mass screening"[MeSH Terms] OR "mass screening"[Title/Abstract] OR "screen*"[Title/Abstract] OR ("diag*"[All Fields] AND "tool"[Title/Abstract]) OR "evaluation"[Title/Abstract] OR (((("ieec int conf automation sci eng case"[Journal] OR "case phila"[Journal] OR "case"[All Fields]) AND "n3"[All Fields]) AND "finding"[Title/Abstract]))</p>                                                                                                                                                                                                                                                                                            |
| AND                                                                                                                                                                                                                                                                                                                                                                                                                                                                                                                                                                                                                                                                                                                                                                                                                                                                                                                                                  |
| <p>("early identification"[Title/Abstract] OR "early identifying"[Title/Abstract] OR "early recognition"[Title/Abstract] OR "timely identification"[Title/Abstract] OR "timely assessment"[Title/Abstract] OR (("identif*"[All Fields] AND "n3"[All Fields]) AND "palliative"[Title/Abstract]) OR (("identif*"[All Fields] AND "n3"[All Fields]) AND "tool"[Title/Abstract]) OR (("identif*"[All Fields] AND "n3"[All Fields]) AND "instruments"[Title/Abstract]) OR (("identif*"[All Fields] AND "n3"[All Fields]) AND "dying"[Title/Abstract]) OR ("identif*"[All Fields] AND "n3 patients"[Title/Abstract]))</p>                                                                                                                                                                                                                                                                                                                                  |

## Appendix S2 Risk of bias for the included studies (Cohort study)

| First author, Year  | Quality Rating Questions |    |     |    |      |    |    |    | Score 1 | Score 2 | Mean |
|---------------------|--------------------------|----|-----|----|------|----|----|----|---------|---------|------|
|                     | 1                        | 2  | 3   | 4  | 5    | 6  | 7  | 8  |         |         |      |
| Rainone 2007        | a*                       | a* | a*  | a* | none | b* | a* | d  | 6       | 7       | 6.5  |
| Haga 2012           | b*                       | a* | a*  | a* | none | b* | a* | a* | 7       | 5       | 6    |
| O'Callaghan 2014    | a*                       | a* | a*  | a* | none | a* | a* | a* | 7       | 7       | 7    |
| Raubenheimer 2019   | b*                       | a* | a*  | a* | none | b* | a* | b* | 7       | 7       | 7    |
| Gómez-Batiste 2017  | a*                       | a* | a*  | a* | none | b* | a* | b* | 7       | 7       | 7    |
| Calsina-Berna 2018  | a*                       | a* | a*  | a* | b**  | a* | a* | a* | 9       | 7       | 8    |
| Gastelurrutia 2019  | a*                       | a* | a** | a* | none | a* | a* | d  | 7       | 7       | 7    |
| TabereroHuguet 2020 | c                        | a* | a*  | a* | b*   | a* | a* | d  | 6       | 8       | 7    |
| Wang 2019           | a*                       | a* | d   | a* | b*   | a* | a* | a* | 7       | 7       | 7    |
| Yen 2020            | a*                       | a* | a*  | a* | b**  | b* | a* | b* | 9       | 7       | 8    |
| Yen 2022            | a*                       | a* | a*  | a* | b**  | b* | a* | b* | 9       | 7       | 8    |
| Yen 2022            | a*                       | a* | a*  | a* | b**  | b* | a* | d  | 8       | 7       | 7.5  |
| DeBock 2017         | a*                       | a* | a*  | a* | none | a* | a* | d  | 6       | 7       | 6.5  |
| SyChan 2020         | a*                       | a* | a*  | a* | none | a* | a* | a* | 7       | 7       | 7    |
| Piers 2021          | b*                       | a* | a*  | a* | none | a* | a* | a* | 7       | 6       | 6.5  |
| VanWijmen 2021      | a*                       | a* | a** | a* | none | b* | a* | b* | 8       | 7       | 7.5  |
| Low 2021            | b*                       | a* | a*  | a* | none | a* | a* | d  | 6       | 8       | 7    |

## Appendix S2 Risk of bias for the included studies (RCT study)

| First author, Year | Bias                                        |                                         |                                          |                                                 |                                          |                                      |
|--------------------|---------------------------------------------|-----------------------------------------|------------------------------------------|-------------------------------------------------|------------------------------------------|--------------------------------------|
|                    | Selection bias (Random sequence generation) | Selection bias (Allocation concealment) | Blinding of participants and researchers | Detection bias (Blinding of outcome assessment) | Attrition bias (Incomplete outcome data) | Reporting bias (Selective reporting) |
| Mitchell 2018      | High risk                                   | Unclear risk                            | Low risk                                 | Low risk                                        | Low risk                                 | Unclear risk                         |

Appendix S3 Publication bias of SPICT

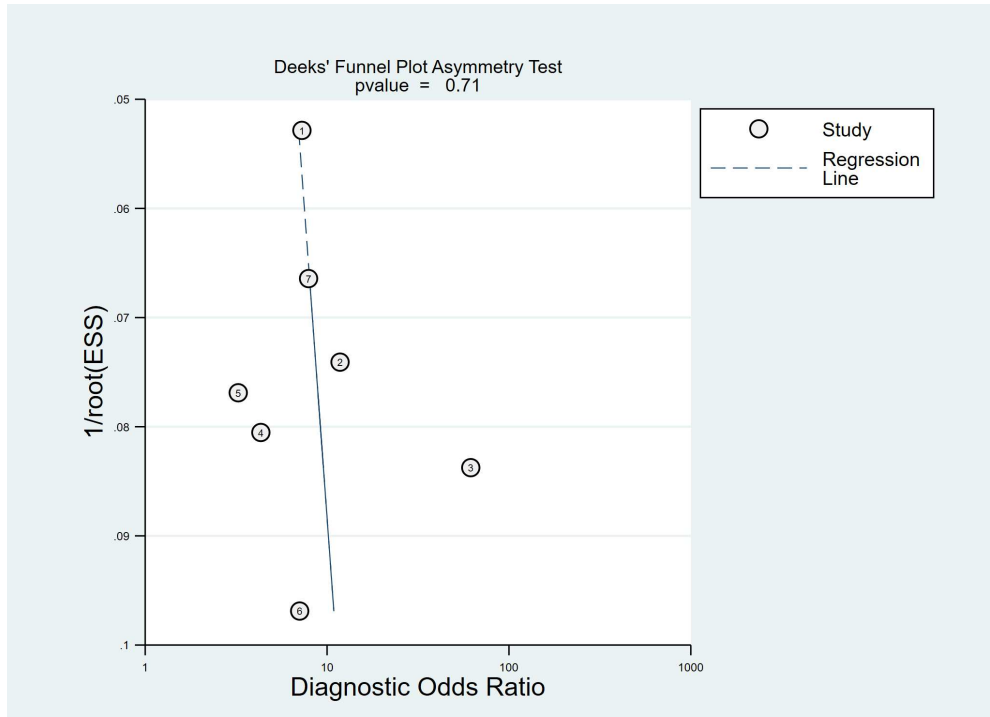

Appendix S3 Publication bias of NECPAL

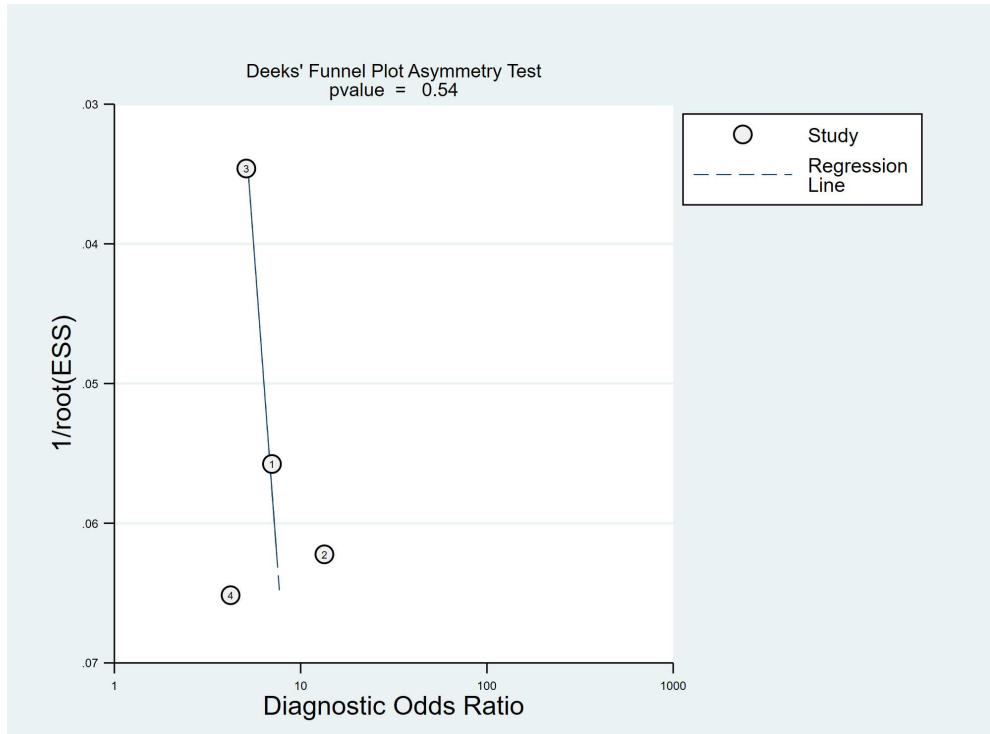

Appendix S3 Publication bias of TW-PCST

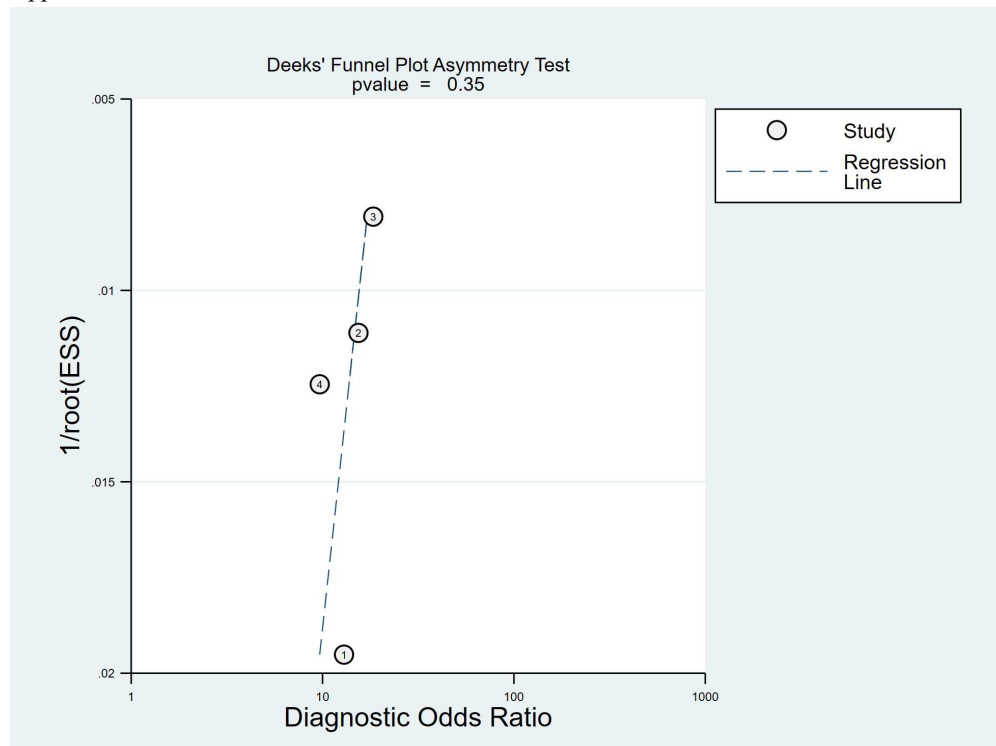

Appendix S4 Main features of the identified screening instruments (Continued)

|                               | GSF-PIG                                                                                                                                                                | RADPAC            | NECAPL                                                                                                                     | SPICT                                                                                                                      | TW-PCST                                                                                                                                                              | Rainone                                                                              | Anticipal                                                                                |
|-------------------------------|------------------------------------------------------------------------------------------------------------------------------------------------------------------------|-------------------|----------------------------------------------------------------------------------------------------------------------------|----------------------------------------------------------------------------------------------------------------------------|----------------------------------------------------------------------------------------------------------------------------------------------------------------------|--------------------------------------------------------------------------------------|------------------------------------------------------------------------------------------|
| General indicators            |                                                                                                                                                                        |                   |                                                                                                                            |                                                                                                                            |                                                                                                                                                                      |                                                                                      |                                                                                          |
| Functional performance        | General physical decline;<br>Spends 50% of the day in bed or chair;<br>Experiencing increased dependence on most daily activities;                                     | NM                | Karnofsky or Barthel score > 30%;<br>Loss more than 2 activities of daily living;<br>Persistent symptoms;                  | Poor performance status;<br>Spends 50% of the day in bed or chair;                                                         | Assessing performance status using ECOG scale.                                                                                                                       | Karnofsky score > 50%;<br>Loss ≥2 activities of daily living;<br>ECOG score ≤3;      | The entry indicates a very poor code                                                     |
| Unplanned hospital admissions | Repeated                                                                                                                                                               | NM                | More than 2 unplanned hospital admittances at last 6 months.                                                               | Unplanned hospital admissions;                                                                                             | More than 6 hospital admissions for the same diagnosis in the past 30 days;<br>An ICU stay exceeding 30 days with a poor prognosis or ineffective treatment;         | Recurrent or extended hospital admissions for the same illness in the past 12 months | NM                                                                                       |
| Symptom burden                | Unstable, deteriorating, complex symptom burden                                                                                                                        | NM                | NM                                                                                                                         | Persistent symptoms despite optimal but ineffective treatment.                                                             | Unacceptable pain                                                                                                                                                    | NM                                                                                   | NM                                                                                       |
| Specific clinical indicators  | Cancer, General Neurological, CHF, COPD, Liver disease, Frailty, Dementia, Stroke, Kidney disease, Parkinson's disease, Motor Neurological disease, Multiple Sclerosis | Cancer, COPD, CHF | Cancer, COPD, CHF, Dementia, Frailty, Stroke, Chronic Neurological Diseases, Chronic Liver disease, Chronic kidney disease | Cancer, Heart/vascular disease, kidney disease, Dementia/Frailty, Respiratory disease, Liver disease, Neurological disease | 2 points for any of the following: Cancer, COPD, Liver disease, Kidney dialysis, Cardiac disease, Neurologic disease (stroke, coma, dementia), ARDS, Sepsis, or MODS | AIDS, Cancer, CHF, COPD, Dementia                                                    | Cancer, Heart/vascular disease, Dementia, Frailty, Stroke, Kidney disease, Liver disease |

(Continued)

Appendix S4 Main features of the identified screening instruments (Continued)

|                          | GSF-PIG                                               | RADPAC | NECPAL                                                                                                                                                  | SPICT                                                                                  | TW-PCST                                                                       | Rainone                                                                                                                               | Anticpal                                                    |
|--------------------------|-------------------------------------------------------|--------|---------------------------------------------------------------------------------------------------------------------------------------------------------|----------------------------------------------------------------------------------------|-------------------------------------------------------------------------------|---------------------------------------------------------------------------------------------------------------------------------------|-------------------------------------------------------------|
| Comorbid illness         | Significant multi-morbidities                         | NM     | >2 chronic diseases                                                                                                                                     | NM                                                                                     | 1 point for each cancer and five comorbidities                                | NM                                                                                                                                    | Codes indicating multi-organ failure and multiple morbidity |
| Psychosocial aspects     | NM                                                    | NM     | Cognitive decline: Loss > minimal or > 3 Pfeiffer; Detection of Emotional Distress Scale (DME) > 9                                                      | NM                                                                                     | Psycho-spiritual problems out of control                                      | Patients or family members are frustrated after an acute illness attack because the results are not optimal after the best treatment. | NM                                                          |
| Adverse events happen    | Seriously fall, bereavement, transfer to nursing home | NM     | Geriatric Syndromes ( $\geq 2$ geriatric syndromes (recurrent or persistent))                                                                           | NM                                                                                     | NM                                                                            | NM                                                                                                                                    | NM                                                          |
| Choosing palliative care | Choosing no further active treatment                  | NM     | Limitations of therapeutic effort were mentioned by patients, family or team members.                                                                   | Patients request palliative care or reduce treatment or wish focus on quality of life. | Patients/family/team need help with complex decision making and goal setting. | NM                                                                                                                                    | NM                                                          |
| Others                   | Considered eligible for DS1500 payment.               | NM     | Demand: Have the patient, family, or team members made any requests to limit treatment or palliative care?<br>Need: Identified by healthcare professors | The carter needs more help.<br>Care Plan<br>Recommendations.                           | NM                                                                            | NM                                                                                                                                    | NM                                                          |

ARDS, acute respiratory distress syndrome; COPD, chronic obstructive pulmonary disease; CHF, Congestive heart failure; MODS, multiple organ dysfunction syndrome; GSF-PIG, Gold Standards Framework Prognostic Indicator Guidance; NECPAL, Necesidades Paliativas [PalliativeNeeds]; RADPAC, RADboud indicators for Palliative Care needs; SPICT, Supportive and Palliative Care Indicators Tool; TW-PCST, Taiwanese version Palliative Care Screening Tool; SQ, Surprise Question; DS1500, a medical report that enables advanced diseases patients in the UK to access social care; NR, not reported; NM, not mentioned; NA, not applicated;

Appendix S5 Summary of the psychometric properties of screening instruments for early identification of patients in need of palliative care

|           | Reference (Country) | Content validity |    |                   |    |                   |    | Structural validity |    | Internal consistency |    | Cross-cultural validity |    | Reliability |    | Measurement error |    | Criterion validity |    |
|-----------|---------------------|------------------|----|-------------------|----|-------------------|----|---------------------|----|----------------------|----|-------------------------|----|-------------|----|-------------------|----|--------------------|----|
|           |                     | Relevance        |    | Comprehensiveness |    | Comprehensibility |    | MQ                  | OR | MQ                   | QR | MQ                      | QR | MQ          | QR | MQ                | OR | MQ                 | QR |
|           |                     | MQ               | QR | MQ                | QR | MQ                | QR | MQ                  | OR | MQ                   | QR | MQ                      | QR | MQ          | QR | MQ                | OR | MQ                 | QR |
| GSF-PIG   | UK                  | NR               |    | NR                |    | NR                |    | NR                  |    | NR                   |    | NR                      |    | NR          |    | NR                |    | NR                 |    |
|           | Italia              | NR               |    | NR                |    | NR                |    | NR                  |    | NR                   |    | NR                      |    | NR          |    | NR                |    | NR                 |    |
| RADPAC    | Netherlands         | 3                | -  | 3                 | -  | 3                 | -  | NR                  |    | NR                   |    | NR                      |    | NR          |    | NR                |    | NR                 |    |
| NECPAL    | Spain               | 3                | +  | 3                 | +  | 3                 | +  | NR                  |    | NR                   |    | NR                      |    | NR          |    | NR                |    | NR                 |    |
|           | Portugal            | 3                | ±  | 3                 | ±  | 3                 | ?  | NR                  |    | NR                   |    | NR                      |    | NR          |    | NR                |    | NR                 |    |
|           | Israel              | 3                | +  | 2                 | +  | 3                 | ?  | NR                  |    | NR                   |    | NR                      |    | 1           | +  | NR                |    | NR                 |    |
| SPICT     | UK                  | 3                | ±  | 3                 | -  | 3                 | -  | NR                  |    | NR                   |    | NR                      |    | NR          |    | NR                |    | NR                 |    |
|           | German              | 3                | ±  | 3                 | ?  | 3                 | -  | NR                  |    | NR                   |    | NR                      |    | NR          |    | NR                |    | NR                 |    |
|           | Spain               | 3                | ±  | 3                 | -  | 3                 | -  | NR                  |    | 2                    | +  | NR                      |    | 2           | +  | NR                |    | NR                 |    |
|           | Italia              | 2                | +  | 2                 | +  | 2                 | +  | NR                  |    | 1                    | +  | NR                      |    | 2           | +  | NR                |    | NR                 |    |
|           | Thailand            | 2                | +  | 2                 | +  | 3                 | +  | NR                  |    | 2                    | -  | 2                       | +  | 2           | +  | NR                |    | NR                 |    |
|           | Denmark             | 3                | ±  | 2                 | +  | 3                 | -  | NR                  |    | NR                   |    | NR                      |    | NR          |    | NR                |    | NR                 |    |
|           | Sweden              | 2                | ±  | 3                 | -  | 3                 | -  | NR                  |    | NR                   |    | NR                      |    | NR          |    | NR                |    | NR                 |    |
|           | Indonesia           | 3                | ?  | 3                 | ?  | 3                 | ?  | NR                  |    | 2                    | +  | NR                      |    | 1           | +  | NR                |    | NR                 |    |
|           | Japan               | 3                | ±  | 3                 | ?  | 3                 | -  | NR                  |    | NR                   |    | NR                      |    | NR          |    | NR                |    | NR                 |    |
| Chile     | 3                   | ?                | 3  | ?                 | 4  | -                 | NR |                     | 1  | +                    | NR |                         | NR |             | NR |                   | NR |                    |    |
| TW-PCST   | China Taiwan        | 4                | ?  | 4                 | ?  | 4                 | ?  | NR                  | NR | NR                   | NR | NR                      | NR | NR          | NR | NR                | NR | NR                 | NR |
| Rainone   | USA                 | 4                | ?  | 4                 | ?  | 4                 | ?  | NR                  | NR | NR                   | NR | NR                      | NR | NR          | NR | NR                | NR | NR                 | NR |
| AncitiPal | UK                  | 2                | -  | 2                 | -  | 3                 | -  | NR                  | NR | NR                   | NR | NR                      | NR | NR          | NR | NR                | NR | NR                 | NR |

MQ, measurement quality; QR, quality rating; NR, not reported

1 = very good, 2 = sufficient, 3 = doubtful, 4 = inadequate;

+, sufficient; -, insufficient; ±, inconsistent; ? indeterminate

Appendix S6 Details clinical performance of the identified screening instruments reported in performance studies

| Reference (Author, Year)                     | Screening instruments | Time frame of instruments | No. patients assessed (n) | No. Identified/Not identified (n) | No. patients died (n) | No. patient survival(n) | Sensitivity% (95% CI) | Specificity% (95% CI) | LR+ (95% CI)        | LR- (95% CI)        | PPV% (95% CI)       | NPV% (95% CI)       | c-statistic (95% CI) | DOR   |
|----------------------------------------------|-----------------------|---------------------------|---------------------------|-----------------------------------|-----------------------|-------------------------|-----------------------|-----------------------|---------------------|---------------------|---------------------|---------------------|----------------------|-------|
| Haga K et al 2014 <sup>[49]</sup>            | GSF-PIG               | 12-month                  | 138                       | 110<br>28                         | 36<br>7               | 74<br>21                | 83.0                  | 22.0                  | 1.06                | 0.77                | 33.0                | 5.0                 | NR                   | 1.38  |
| O'Callaghan A et al 2014 <sup>[50]</sup>     | GSF-PIG               | 12-month                  | 501                       | 99<br>402                         | 67<br>40              | 32<br>362               | 62.6                  | 91.9                  | 7.73                | 0.41                | 67.7                | 90.0                | NR                   | 18.85 |
| Raubenheimer PJ et al 2019 <sup>[51]</sup>   | GSF-PIG               | 12-month                  | 822                       | 218<br>604                        | 122<br>42             | 98<br>562               | 74.0<br>(68.0-81.0)   | 85.0<br>(83.0-88.0)   | 5.10<br>(4.15-6.26) | 0.30<br>(0.23-0.39) | 56.0<br>(49.0-63.0) | 93.0<br>(91.0-95.0) | NR                   | 17.00 |
| Gómez-Batiste X et al 2017 <sup>[52]</sup>   | NECPAL                | 12-month                  | 1059                      | 780<br>279                        | 261<br>25             | 519<br>254              | 91.3<br>(87.2-94.2)   | 32.9<br>(29.6-36.3)   | 1.36                | 0.26                | 33.5<br>(30.2-36.9) | 91.0<br>(86.9-94.0) | NR                   | 5.23  |
| Calsina-Berna A et al 2018 <sup>[53]</sup>   | NECPAL                | 12-month                  | 236                       | 97<br>139                         | 70<br>53              | 27<br>86                | 56.9                  | 76.1                  | 2.38                | 0.57                | 72.2                | 61.9                | 0.665                | 4.18  |
| Gastelurruti P et al 2019 <sup>[54]</sup>    | NECPAL                | 12-month                  | 922                       | 897<br>625                        | 65<br>24              | 232<br>601              | 73.0                  | 72.1                  | 2.62                | 0.37                | 21.9                | 96.2                | 0.73<br>(0.68-0.78)  | 7.08  |
| Taberero Huguet E et al 2020 <sup>[55]</sup> | NECPAL                | 12-month                  | 363                       | 87<br>276                         | 54<br>30              | 33<br>246               | 64.3                  | 88.2                  | 5.70                | 0.43                | 62.1                | 89.1                | NR                   | 13.23 |
| De Bock et al 2017 <sup>[61]</sup>           | SPICT                 | 12-month                  | 410                       | 228<br>182                        | 111<br>21             | 117<br>161              | 84.1                  | 57.9                  | 4.23                | 0.58                | 48.7                | 88.5                | NR                   | 7.29  |
| Mitchell GK et al 2018 <sup>[60]</sup>       | SPICT                 | 12-month                  | 1525                      | 78<br>1447                        | 16<br>31              | 31<br>1416              | 34.0<br>(25.3-42.8)   | 95.8<br>(93.0-98.6)   | 8.10                | 0.65                | 20.5<br>(12.6-28.4) | 97.9<br>(96.8-99.0) | NR                   | 12.46 |
| van Wijmen MPS et al 2020 <sup>[62]</sup>    | SPICT-NL              | 12-month                  | 3640                      | 101<br>3539                       | 21<br>15              | 80<br>3524              | 58.0<br>(43.0-73.0)   | 98.0<br>(97.0-98.0)   | 29.00               | 0.43                | 20.8                | 99.6                | NR                   | 67.44 |

(Continued)



Appendix S6 Details clinical performance of the identified screening instruments reported in performance studies (Continued)

| Reference (Author, Year)                  | Screening instruments | Time frame of instruments | No. patients assessed (n) | No. Identified/Not identified (n) | No. patients died (n) | No. patient survival(n) | Sensitivity% (95% CI) | Specificity% (95% CI) | LR+ (95% CI) | LR- (95% CI) | PPV% (95% CI)       | NPV% (95% CI)       | c-statistic (95% CI)   | DOR   |
|-------------------------------------------|-----------------------|---------------------------|---------------------------|-----------------------------------|-----------------------|-------------------------|-----------------------|-----------------------|--------------|--------------|---------------------|---------------------|------------------------|-------|
| Piers R et al 2021 <sup>[64]</sup> (AGUs) | SPICT-FR and SPICT-NK | 12-month                  | 209                       | 124<br>85                         | 42<br>9               | 82<br>76                | 82.4                  | 48.1                  | 1.59         | 0.37         | 33.9                | 89.3                | 0.822                  | 4.30  |
| Piers R et al 2021 <sup>[64]</sup> (CUs)  | SPICT-FR and SPICT-NK | 12-month                  | 249                       | 101<br>148                        | 34<br>20              | 67<br>128               | 63.0                  | 65.6                  | 1.83         | 0.56         | 33.7                | 86.8                | 0.651                  | 3.28  |
| Low J et al 2021 <sup>[21]</sup>          | SPICT                 | 12-month                  | 117                       | 61<br>56                          | 33<br>8               | 28<br>48                | 80.5<br>(65.1-91.2)   | 63.2<br>(51.3-73.9)   | 2.19         | 0.31         | 54.1<br>(40.8-66.9) | 85.7<br>(73.8-93.6) | 0.718<br>(0.636-0.800) | 7.06  |
| Chan AS et al 2022 <sup>[63]</sup>        | SPICT                 | 6-month                   | 227                       | 137<br>90                         | 91<br>18              | 46<br>72                | 83.5                  | 61.0                  | 2.14         | 0.27         | 66.4                | 80.0                | NR                     | 7.93  |
| Wang SS et al 2019 <sup>[56]</sup>        | TW-PCST               | 6-month                   | 8493                      | 2568<br>5925                      | 585<br>132            | 1983<br>5793            | 81.6                  | 74.5                  | 3.20         | 0.25         | 22.8                | 97.8                | 0.84<br>(0.83-0.86)    | 12.80 |
| Yen YF et al 2020 <sup>[57]</sup>         | TW-PCST               | 3-month                   | 47153                     | 4897<br>42256                     | 1225<br>896           | 3672<br>41360           | 57.8                  | 91.8                  | 7.05         | 0.46         | 25.0                | 97.9                | NR                     | 15.33 |
| Yen YF et al 2022 <sup>[59]</sup>         | TW-PCST               | 6-month                   | 111483                    | 7428<br>104055                    | 1973<br>2005          | 5455<br>102050          | 49.6<br>(48.0-51.1)   | 94.9<br>(94.8-95.1)   | 9.73         | 0.53         | 26.6<br>(25.8-27.4) | 98.1<br>(98.0-98.2) | 0.723                  | 18.36 |
| Yen YF et al 2022 <sup>[58]</sup>         | TW-PCST               | 12-month                  | 21109                     | 2363<br>18746                     | 806<br>953            | 1557<br>17793           | 45.8<br>(43.4-48.2)   | 92.0<br>(91.6-92.4)   | 5.73         | 0.59         | 34.1<br>(32.6-35.7) | 94.9<br>(94.7-95.2) | 0.689<br>(0.677-0.701) | 9.71  |
| Rainone F et al 2007 <sup>[22]</sup>      | Rainone               | NR                        | 839                       | NR                                | NR                    | NR                      | 94.0                  | 97.0                  | 31.33        | 2.00         | 36.0                | 99.0                | NR                     | 15.67 |

DOR, diagnostic odds ratio; LR+, positive likelihood ratio; LR-, negative likelihood ratio; NPV, negative predictive value; PPV, positive predictive value; GSF-PIG, Gold Standards Framework Prognostic Indicator Guidance; NECPAL, Necesidades Paliativas [PalliativeNeeds]; RADPAC, RADboud indicators for Palliative Care needs; SPICT, Supportive and Palliative Care Indicators Tool; TW-PCST, Taiwanese version Palliative Care Screening Tool; NR = not reported
